# Supplementary material
Source: Springer Nature journal article supplement (https://www.springermedizin.de/resource/supplementary/12985_2013_2486_MOESM13_ESM.pdf/9606832)
Supplement: MOESM13 [file 9606832]

| <b>A</b>                                     | Viral processes                        | Attachment to the plasma membrane, fusion and entry |                                       |        | Cellular signaling | Early transport | Integration | Transcription                       |                     |
|----------------------------------------------|----------------------------------------|-----------------------------------------------------|---------------------------------------|--------|--------------------|-----------------|-------------|-------------------------------------|---------------------|
|                                              | Function or sub-process affected       | Viral receptor                                      | Co-alternate receptors & determinants | Fusion |                    | Nucl. import    |             | Epigenetic & chromatin modification | Promoter modulation |
| <b>Differentially expressed target genes</b> |                                        |                                                     |                                       |        |                    |                 |             |                                     |                     |
| Gene symbol                                  | Denomination                           |                                                     |                                       |        |                    |                 |             |                                     |                     |
| CD4                                          | T cell surface glycoprotein            | ••                                                  |                                       |        | ••                 |                 |             |                                     |                     |
| FUT7                                         | Fucosyl transferase 7                  |                                                     | ••                                    |        |                    |                 |             |                                     |                     |
| FUT4                                         | Fucosyl transferase 4                  |                                                     | •                                     |        |                    |                 |             |                                     |                     |
| SIAT9                                        | Sialyl transferase 9                   |                                                     | ••                                    |        |                    |                 |             |                                     |                     |
| CD44                                         | Hyaluronic acid receptor               |                                                     |                                       |        | •                  |                 |             |                                     |                     |
| CCL17                                        | Chemokine (C-C motif) ligand 17        |                                                     |                                       |        | ••                 |                 |             |                                     |                     |
| CD3Z                                         | T cell receptor ζ domain               |                                                     |                                       |        | ••                 |                 |             |                                     |                     |
| NUP 205                                      | Nucleoporin 205                        |                                                     |                                       |        |                    | •               |             |                                     |                     |
| HIST3H2A                                     | Histon 3, H2A type                     |                                                     |                                       |        |                    |                 | •           |                                     |                     |
| HIST2H2AA3                                   | Histon 2, H2A type                     |                                                     |                                       |        |                    |                 | •           |                                     |                     |
| PLU1                                         | JARID1B, H3K4 demethylase              |                                                     |                                       |        |                    |                 | ••          |                                     |                     |
| ATR                                          | Ataxia telangiectasia and Rad3-related |                                                     |                                       |        |                    |                 | ••          |                                     |                     |
| <b>Top Hubs</b>                              |                                        |                                                     |                                       |        |                    |                 |             |                                     |                     |
| Cav-1                                        | Caveolin-1                             |                                                     |                                       | ••     |                    |                 |             |                                     | ••                  |

| <b>B</b>                                                                                   |                                               |    | Interference with cell growth |           |               |
|--------------------------------------------------------------------------------------------|-----------------------------------------------|----|-------------------------------|-----------|---------------|
|                                                                                            | Function or sub-process affected              |    | Cell cycle                    | Apoptosis | Proliferation |
| <b>Differentially expressed target genes</b>                                               |                                               |    |                               |           |               |
| Gene symbol                                                                                | Denomination                                  |    |                               |           |               |
| LTA                                                                                        | Lymphotoxin α                                 |    |                               | •         |               |
| TNFRSF1B                                                                                   | TNF receptor superfamily, member 1B           |    |                               | ••        |               |
| TNFRSF21                                                                                   | TNF receptor superfamily, member 21           |    |                               | •         |               |
| ATR                                                                                        | Ataxia telangiectasia and Rad3-related        | •• |                               | ••        |               |
| IGFBP2                                                                                     | Insulin-like growth factor binding protein 2  |    |                               | ••        |               |
| IGFBP3                                                                                     | Insulin-like growth factor binding protein 3  |    |                               | ••        |               |
| PTPRF                                                                                      | Protein tyrosine phosphatase, receptor type F |    | •                             |           | •             |
| IGF2                                                                                       | Insulin-like growth factor 2                  |    |                               |           | ••            |
| CCNA2                                                                                      | Cyclin A2                                     | •  |                               |           |               |
| GAS2L1                                                                                     | Growth arrest-specific protein 2-like 1       | •• |                               |           |               |
| BARD1                                                                                      | BRC A1 associated RING domain 1               | •  |                               |           | •             |
| MSH2                                                                                       | MutS protein homolog 2                        | •  |                               |           |               |
| FNTB                                                                                       | Farnesyl transferase CAAX-Box β               | •  |                               |           |               |
| NDC80                                                                                      | Kinetochores Complex Component                | •  |                               |           |               |
| <b>Non-differentially expressed key regulators* and differentially expressed top hubs#</b> |                                               |    |                               |           |               |
| Cav-1#                                                                                     | Caveolin-1                                    |    |                               | ••        | ••            |
| c-myc*                                                                                     | affected                                      | ○  | ○                             |           | ○             |
| p53*                                                                                       | active                                        | ○  | ○                             |           | ○             |
| E2F1*                                                                                      | inhibited                                     | ○  |                               |           |               |
| E2F4*                                                                                      | Inhibited                                     | ○  |                               |           |               |
| MADH1#                                                                                     | SMAD1                                         | •• |                               | ••        |               |
